# Supplementary material for: Environmental Health in Perinatal and Early Childhood: Awareness, Representation, Knowledge and Practice of Southern France Perinatal Health Professionals
Source: MDPI journal article supplement (doi:10.3390/ijerph15102259), 2018-10-15
Supplement: s1 [file s1]

## Supplementary Materials

**Table S1:** Structure of the questionnaire

|                                                                                                                                                   |                       |                                       |                       |                      |                       |
|---------------------------------------------------------------------------------------------------------------------------------------------------|-----------------------|---------------------------------------|-----------------------|----------------------|-----------------------|
| 3 words or expressions arising to you when you read 3 Environmental health<br>(Followed by WHO 's definition of Environmental Health)             |                       |                                       |                       |                      |                       |
| 1.                                                                                                                                                |                       |                                       |                       |                      |                       |
| 2.                                                                                                                                                |                       |                                       |                       |                      |                       |
| 3.                                                                                                                                                |                       |                                       |                       |                      |                       |
| Q1 to Q25:<br>See table 2<br>of the<br>manuscript                                                                                                 | 1 = fully<br>disagree | 2 = partially<br>disagree             | 3 = does not<br>know  | 4 = rather agree     | 5 = strongly<br>agree |
| Q 26: According to you among these propositions, which one(s) are potential source of lead exposure? (multiple choice question)                   |                       |                                       |                       |                      |                       |
| Some traditional make-up<br>(Kohl eye-liner)                                                                                                      | Tap water             | Own grown fruits<br>and vegetables    | Some paints           | Some toys            |                       |
| Q 27: According to you among these propositions, which one(s) are potential source of exposure to endocrine disruptors (multiple choice question) |                       |                                       |                       |                      |                       |
| Natural cleaning products (Black soap, Marseille's soap                                                                                           | Some toys             | Some cosmetic and<br>hygiene products | Food glass containers |                      |                       |
| Q 28: (Open question) According to you what are the dominant environmental issues in you geographic area of practice                              |                       |                                       |                       |                      |                       |
| Q 29: In your professional daily practice, do you feel concerned by environmental issues?                                                         |                       |                                       |                       |                      |                       |
| 1 = not                                                                                                                                           | 2 = not really        | 3 = mildly                            | 4 = rather            | 5 = fully concerned  |                       |
| Q 30: Do you feel the necessity to inform your patients regarding environmental health issues?                                                    |                       |                                       |                       |                      |                       |
| 1 = not                                                                                                                                           | 2 = not really        | 3 = mildly                            | 4 = rather            | 5 = fully concerned  |                       |
| Q 31: Do you face difficulties to inform your patients regarding environmental health issues                                                      |                       |                                       |                       |                      |                       |
| 1 = never                                                                                                                                         | 2 = seldom            | 3 = sometime                          | 4 = often             | 5 = always           |                       |
| Q 32: (Open question) According to you what are the reasons you are facing difficulties to inform patients?                                       |                       |                                       |                       |                      |                       |
| Q 33: Are you facing difficulties to refer patients to experts?                                                                                   |                       |                                       |                       |                      |                       |
| 1 = never                                                                                                                                         | 2 = seldom            | 3 = sometime                          | 4 = often             | 5 = always           |                       |
| Q 34: How would you evaluate your knowledge in Environmental health?                                                                              |                       |                                       |                       |                      |                       |
| 1 = null                                                                                                                                          | 2 = poor              | 3 = average                           | 4 = good              | 5 = excellent        |                       |
| Q 35: Would you be interested in a professional training in Environmental Health in the field of perinatology and fertility                       |                       |                                       |                       |                      |                       |
| 1 = not                                                                                                                                           | 2 = not really        | 3 = mildly                            | 4 = rather            | 5 = fully interested |                       |
| Socio-demographic questions                                                                                                                       |                       |                                       |                       |                      |                       |
| Age                                                                                                                                               |                       |                                       |                       |                      |                       |
| Sex                                                                                                                                               |                       |                                       |                       |                      |                       |
| Professional postal code                                                                                                                          |                       |                                       |                       |                      |                       |
| Profession                                                                                                                                        |                       |                                       |                       |                      |                       |
| Year of qualification                                                                                                                             |                       |                                       |                       |                      |                       |
| Length of service                                                                                                                                 |                       |                                       |                       |                      |                       |
| Environmental Health initial training                                                                                                             |                       |                                       |                       |                      |                       |
| Environmental Health secondary training                                                                                                           |                       |                                       |                       |                      |                       |
| Mean of information on the subject                                                                                                                |                       |                                       | If YES which one?     |                      |                       |

**Table S2:** Size and list of occupation represented in the questionnaire survey

| Occupation               | n= 843 |
|--------------------------|--------|
| Midwife                  | 346    |
| Nursery nurse            | 93     |
| Pediatrician             | 74     |
| Obstetrician             | 74     |
| General Practitioner     | 46     |
| Nurse                    | 42     |
| Nursery nurse assistant  | 34     |
| Social worker            | 21     |
| Gynecologist             | 21     |
| Family home visitor      | 21     |
| Nursery director         | 17     |
| Nutritionist             | 12     |
| Psychologist             | 13     |
| Health care manager      | 3      |
| Endocrinologist          | 3      |
| Medical secretary        | 2      |
| Speech therapist         | 2      |
| Nursing assistant        | 2      |
| Pediatric psychiatrist   | 3      |
| Chaplain                 | 2      |
| Teacher                  | 2      |
| Anesthesiologist         | 2      |
| Physiotherapist          | 2      |
| Administrative assistant | 1      |
| Radiologist              | 1      |
| Geneticist               | 1      |
| Housing health advisor   | 1      |
| Biologist                | 1      |

**Table S3: Representation of Environmental health: content thematic analysis (1/6)**

| Theme                                                       | Number of response<br>Frequency n (%) <sup>a</sup> | Sub-theme                      | Frequency<br>n (%) <sup>b</sup> | Qualitative data                                                                                                                                                                       |
|-------------------------------------------------------------|----------------------------------------------------|--------------------------------|---------------------------------|----------------------------------------------------------------------------------------------------------------------------------------------------------------------------------------|
| <b>Theme 1:</b> Toxic agents and environmental health risks | 613 (68)                                           | Pollution                      | 553 (73.9)                      | Pollution(s), pollutants, impact of pollution, air quality pollution, air quality, atmospheric pollution, fine particles, water pollution, water quality, Earth                        |
|                                                             |                                                    | Toxicants in food              | 262 (42.7)                      | Pesticides, food quality, food products, nutrition, healthy food, food contamination, unhealthy diet, food additives, organic, local agriculture, genetically modified micro-organisms |
|                                                             |                                                    | Endocrine Disruptors           | 120 (19.6)                      | Endocrine disruptors, disrupting agents, endocrine inducers, hormonal disruptors                                                                                                       |
|                                                             |                                                    | Physical and chemical agents   | 36 (6.4)                        | Chemistry, chemicals, bisphenol, parabens, asbestos, phthalate, heavy metals, lead, gasoil, perfumes, solvents, paints and varnishes, medication                                       |
|                                                             |                                                    | Addiction                      | 21 (3.4)                        | Tobacco, smocking, passive smoking, drugs and toxics                                                                                                                                   |
|                                                             |                                                    | Noise                          | 15 (2.4)                        | Noise, noise nuisance, noise pollution                                                                                                                                                 |
|                                                             |                                                    | Household and Everyday objects | 14 (2.3)                        | Plastics, daily products, furniture, aerosol                                                                                                                                           |
|                                                             |                                                    | Waves                          | 13 (2.1)                        | Waves, Wi-Fi, micro-waves                                                                                                                                                              |
|                                                             |                                                    | Stress                         | 10 (1.6)                        | Stress, work related stress                                                                                                                                                            |
|                                                             |                                                    | Cosmetics and hygiene products | 9 (1.5)                         | Hygiene products, cosmetics, beauty products, baby care products                                                                                                                       |
|                                                             |                                                    | Waste                          | 7 (1.1)                         | Wastes                                                                                                                                                                                 |
|                                                             |                                                    | House cleaning products        | 6 (1)                           | Cleaning agents, deteratives, household products                                                                                                                                       |
|                                                             |                                                    | Light                          | 3 (0.5)                         | Light, light pollution                                                                                                                                                                 |

<sup>a</sup> with respect to the number of HPs participant to the survey, <sup>b</sup> with respect to the number of HPs who cited this sub-theme

**Table S3: Representation of Environmental health: content thematic analysis (2/6)**

| Theme                                                                            | Number of response<br>Frequency n (%) <sup>a</sup> | Sub-theme                                                          | Frequency<br>n (%) <sup>b</sup> | Qualitative data                                                                                                                                                                                                   |
|----------------------------------------------------------------------------------|----------------------------------------------------|--------------------------------------------------------------------|---------------------------------|--------------------------------------------------------------------------------------------------------------------------------------------------------------------------------------------------------------------|
| <b>Theme 2:</b><br>Collective<br>means of action<br>(society and<br>communities) | 293 (32.5)                                         | Act for earth protection<br>and respect for the<br>environment     | 163 (55.6)                      | Protection, protect, environmental compliance, respect, respect for the<br>environment, welfare, caring, ecology, green, sustainable development,<br>renewable energy, energy saving, waste recycling, zero waste, |
|                                                                                  |                                                    | Develop prevention,<br>inform and raise<br>awareness of the public | 131 (44.7)                      | Prevention, anticipation, information, raise awareness, vaccination<br>campaign, screening, health promotion, health education, therapeutic patient<br>education                                                   |
|                                                                                  |                                                    | Patient care proposition                                           | 19 (6.5)                        | Care, care project, care pathway, care, listening, support                                                                                                                                                         |
|                                                                                  |                                                    | Young age education                                                | 12 (4.1)                        | Education, school                                                                                                                                                                                                  |
|                                                                                  |                                                    | Promotion of specialized<br>health care establishment              | 11 (3.8)                        | Hospitals, Mother Infant Care Centres, medico-social centres, health care<br>centres, medical facilities, medical home visit                                                                                       |
|                                                                                  |                                                    | Coordinate and facilitate<br>health professionals<br>collaboration | 7 (2.4)                         | Social and medical networks, multidisciplinary care, team working, inter-<br>professionals collaboration                                                                                                           |
|                                                                                  |                                                    | Organization of training<br>courses                                | 3 (1)                           | Training, conferences, scientific meetings                                                                                                                                                                         |
|                                                                                  |                                                    | Promote medical<br>research                                        | 2 (0.7)                         | Research                                                                                                                                                                                                           |
|                                                                                  |                                                    | Care management<br>recommendation writing                          | 1 (0.3)                         | Recommendation for health professionals                                                                                                                                                                            |

<sup>a</sup> with respect to the number of HPs participants to the survey, <sup>b</sup> with respect to the number of HPs who cited this sub-theme

**Table S3: Representation of Environmental health: content thematic analysis (3/6)**

| Theme                                                                                  | Number of response<br>Frequency n (%) <sup>a</sup> | Sub-theme                                   | Frequency<br>n (%) <sup>b</sup> | Qualitative data                                                                                                                                                                         |
|----------------------------------------------------------------------------------------|----------------------------------------------------|---------------------------------------------|---------------------------------|------------------------------------------------------------------------------------------------------------------------------------------------------------------------------------------|
| <b>Theme 3:</b><br>Individual<br>means of action                                       | 73 (8.1)                                           | Healthy way of life                         | 35 (47.9)                       | Menstrual cups, reusable nappies, environmental friendly products, healthy and safe products, chose natural materials, modification of comportments, good practices, consume differently |
|                                                                                        |                                                    | Physical activity                           | 22 (15.1)                       | Physical activity, sport, physical exercise promotion                                                                                                                                    |
|                                                                                        |                                                    | Precautionary principle                     | 6 (8.2)                         | Precautionary principle, caution                                                                                                                                                         |
|                                                                                        |                                                    | Ventilate premises                          | 4 (5.5)                         | Ventilate, provide better indoor quality                                                                                                                                                 |
| <b>Theme 4:</b><br>Important issue,<br>for today and<br>for the future                 | 94 (10.4)                                          | A long-term issue                           | 34 (36.2)                       | Future, future generation, issue for the future, an absolute necessity for human being, In the long run                                                                                  |
|                                                                                        |                                                    | A big issue                                 | 30 (31.9)                       | Important, essential, key focus, vital, compulsory, emergency, risk, warning, to by studied, disaster                                                                                    |
|                                                                                        |                                                    | Environment perceived<br>as a health threat | 21 (22.3)                       | Epidemic, disease outbreak, contamination, contagion, infection, viruses, parasites, poison, poisoning, intoxication                                                                     |
|                                                                                        |                                                    | Current issue                               | 9 (9.6)                         | Current issue, topical subject, fashionable issue                                                                                                                                        |
|                                                                                        |                                                    | challenge                                   | 8 (8.5)                         | Powerlessness, a lot to be done, hard, challenging, lack of means of action, fight                                                                                                       |
| <b>Theme 5:</b><br>adverse<br>consequences of<br>the environment<br>on human<br>health | 89 (9.9)                                           | Pathologies                                 | 32 (36)                         | Pathologies, diseases, syndrome, obesity                                                                                                                                                 |
|                                                                                        |                                                    | Cancers                                     | 28 (31.5)                       | Cancers                                                                                                                                                                                  |
|                                                                                        |                                                    | Allergies                                   | 24 (27)                         | Allergies, allergens                                                                                                                                                                     |
|                                                                                        |                                                    | Reprotoxicity                               | 22 (4.7)                        | Reprotoxic, reprotoxicity, fertility, infertility, reproductive health, preconception                                                                                                    |

<sup>a</sup> with respect to the number of HPs participant to the survey, <sup>b</sup> with respect to the number of HPs who cited this sub-theme

**Table S3: Representation of Environmental health: content thematic analysis (4/6)**

| Theme                                                                          | Number of response<br>Frequency n (%) <sup>a</sup> | Sub-theme                          | Frequency<br>n (%) <sup>b</sup> | Qualitative data                                                                                                                               |
|--------------------------------------------------------------------------------|----------------------------------------------------|------------------------------------|---------------------------------|------------------------------------------------------------------------------------------------------------------------------------------------|
| <b>Theme 6:</b><br>Environmental health more than absence of disease           | 164 (18.2)                                         | Wellbeing                          | 87 (53)                         | Wellbeing                                                                                                                                      |
|                                                                                |                                                    | Quality of life                    | 44 (26.8)                       | Quality of life                                                                                                                                |
|                                                                                |                                                    | Better life                        | 21 (12.8)                       | Everyday comfort, to live better, harmony, good balance, to be in good shape, living healthy and happy, pleasure, serenity, beauty, relaxation |
|                                                                                |                                                    | Social support                     | 16 (9.8)                        | Acquaintance, social support                                                                                                                   |
|                                                                                |                                                    | Feeling secure                     | 14 (8.5)                        | safety                                                                                                                                         |
| <b>Theme 7:</b><br>Impact of socio-demographic factors in environmental health | 101 (11.2)                                         | Living condition                   | 46 (45.5)                       | Daily life, life circumstances, everyday lives, lifestyle, way of life, everyday comfort, daily habits, living space, living environment       |
|                                                                                |                                                    | Housing                            | 27 (26.7)                       | Accommodation, housing, house, home                                                                                                            |
|                                                                                |                                                    | Socio-economic disparities         | 22 (21.8)                       | Socio-economic inequality, social background, precariousness, poverty, social circumstances                                                    |
|                                                                                |                                                    | Working environment                | 12 (11.9)                       | Working environment, workplace, professional dimension                                                                                         |
|                                                                                |                                                    | Access to the care system          | 2 (2)                           | Access to healthcare                                                                                                                           |
| <b>Theme 8:</b><br>Collective responsibility                                   | 56 (6.2)                                           | A public health issue              | 24 (42.9)                       | Public health                                                                                                                                  |
|                                                                                |                                                    | A responsible and collective issue | 20 (35.7)                       | Everyone's responsibility, responsible health concept, collective awareness, solidarity, altruism, collective action, civism                   |
|                                                                                |                                                    | All concerned                      | 15 (26.8)                       | All concerned, general interest, universality, everybody impacted, general public                                                              |
| <b>Theme 9:</b> Places at risk of toxic exposure                               | 44 (4.9)                                           | Houses                             | 27 (61.4)                       | Houses, accommodation, home                                                                                                                    |
|                                                                                |                                                    | Working place                      | 12 (27.3)                       | Working place, working environment                                                                                                             |
|                                                                                |                                                    | Urban and industrial areas         | 5 (11.4)                        | Industry, toxic exposures from the industry, cities                                                                                            |

**Table S3: Representation of Environmental health: content thematic analysis (5/6)**

| Theme                                                                                      | Number of response<br>Frequency n (%) <sup>a</sup> | Sub-theme                                                        | Frequency<br>n (%) <sup>b</sup> | Qualitative data                                                                                                                             |
|--------------------------------------------------------------------------------------------|----------------------------------------------------|------------------------------------------------------------------|---------------------------------|----------------------------------------------------------------------------------------------------------------------------------------------|
| <b>Theme 10:</b><br>perinatal health<br>a gateway to<br>develop<br>environmental<br>health | 12 (1.3)                                           | perinatal health a<br>gateway to develop<br>environmental health | 12 (100)                        | Epigenetics, pregnancy, fetal impregnation, breastfeeding                                                                                    |
|                                                                                            |                                                    | environmental health<br>and general health<br>relation           | 64 (38.6)                       | Health, good health, “A healthy spirit in a healthy body”, healthy, healthy<br>environment                                                   |
|                                                                                            |                                                    | Nature and health<br>relation                                    | 54 (32.5)                       | Nature, forest, plants, trees, mountain, country side, sun, see side, world, Earth                                                           |
| <b>Theme 11:</b><br>definition of<br>environmental<br>health                               | 166 (18.4)                                         | Impact of environment<br>on health                               | 30 (18.2)                       | Impact (or consequences) of environment on health                                                                                            |
|                                                                                            |                                                    | A large field                                                    | 8 (4.8)                         | Global, huge                                                                                                                                 |
|                                                                                            |                                                    | Human adaptation to the<br>environment                           | 8 (4.8)                         | Adaptation to the environment, ergonomics, adaptation to the evolution of the<br>society, conflictual relationship with the evolving society |
|                                                                                            |                                                    | Environment: everything<br>around us                             | 5 (3)                           | Environment: everything around us                                                                                                            |
|                                                                                            |                                                    | Health and environment<br>not dissociable                        | 4 (2.4)                         | Environment dependency, goes hand in hand                                                                                                    |
|                                                                                            |                                                    | No definition                                                    | 4 (2.4)                         | What is it? No idea, it's nothing                                                                                                            |

<sup>a</sup> with respect to the number of HPs participant to the survey, <sup>b</sup> with respect to the number of HPs who cited this sub-theme

**Table S3: Representation of Environmental health: content thematic analysis (6/6)**

| Theme                                                           | Number of response<br>Frequency n (%) <sup>a</sup> | Sub-theme                            | Frequency<br>n (%) <sup>b</sup> | Qualitative data                                                                                                                                                                                                       |
|-----------------------------------------------------------------|----------------------------------------------------|--------------------------------------|---------------------------------|------------------------------------------------------------------------------------------------------------------------------------------------------------------------------------------------------------------------|
| <b>Theme 12:</b> Move toward action for environmental health    | 23 (2.5)                                           | Under estimated issue                | 10 (43.5)                       | inadequately assessed, not done enough in term of scientific research, social denial, inaction, not enough prevention, unawareness, not taken into account (in health care), a problem marginalized, lack of knowledge |
|                                                                 |                                                    | Toward an improvement                | 7 (30.4)                        | Evolution, how to improve, reflection, progress, a new paradigm                                                                                                                                                        |
|                                                                 |                                                    | Raise awareness                      | 3 (13)                          | Awareness                                                                                                                                                                                                              |
|                                                                 |                                                    | commitment                           | 3 (13)                          | Investment, commitment                                                                                                                                                                                                 |
| <b>Theme 13:</b> other political issues in environmental health | 24 (2.7)                                           | Economical and commercial issues     | 8 (33.3)                        | Economy, economic issues, economic interests, financial profits, commercial interests, health economy, health costs                                                                                                    |
|                                                                 |                                                    | Political and economic choices       | 6 (25)                          | Politics, political issues, public authorities, stakeholders                                                                                                                                                           |
|                                                                 |                                                    | Public authorities transparency      | 6 (25)                          | Public authorities ignorance, politically correct, hypocrisy, transparency, honesty, hoax                                                                                                                              |
|                                                                 |                                                    | Lobbying                             | 5 (20.8)                        | Lobbying, influence, industrial lobbies                                                                                                                                                                                |
| <b>Theme 14:</b> Mode of exposure                               | 12 (1.3)                                           | Inhalation                           | 11 (91.7)                       | Breath, breathing, inhalation                                                                                                                                                                                          |
|                                                                 |                                                    | Skin contact                         | 1 (8.3)                         | Contact with the skin                                                                                                                                                                                                  |
| <b>Theme 15:</b> Environmental damage                           | 14 (1.6)                                           | Environmental degradation            | 14 (100)                        | Mundialization, climate change, urbanism, deforestation                                                                                                                                                                |
| <b>Theme 16:</b> Anthropocentric appreciation                   | 39 (4.3)                                           | A human issue<br>Centered on mankind | 39 (100)                        | Human, mankind, children, newborns, family, parents, population(s)                                                                                                                                                     |
| <b>Theme 17:</b> Refer to WHO                                   | 4 (0.4)                                            | Refer to WHO                         | 4 (100)                         | WHO                                                                                                                                                                                                                    |

<sup>a</sup> with respect to the number of HPs participant to the survey, <sup>b</sup> with respect to the number of HPs who cited this sub-theme
